# Supplementary material
Source: PubMed Central journal article supplement (PMC2781676)

## Supplementary figure legend

Supplementary Figure 1. Validating the effects of kinase-dead GSK3 $\beta$  (GSK3 $\beta$  KD) and constitutively active GSK3 $\beta$  (GSK3 $\beta$  S9A) in CGNs. On DIV 5, CGNs were transfected with either HA- GSK3 $\beta$  KD or GSK3 S9A. Twenty-four hours later, cells transfected with HA- GSK3 $\beta$  KD were treated in 5 mM KCl medium for 2 hours. Immunocytochemistry was done using primary antibodies for HA (Roche) and for phos-S33S37T41- $\beta$ -catenin (Cell Signaling). Average phos- $\beta$ -catenin immunofluorescence intensity of 100 cells in each group was calculated (\*,  $p < 0.05$ ,  $n = 3$ ).

Supp fig1

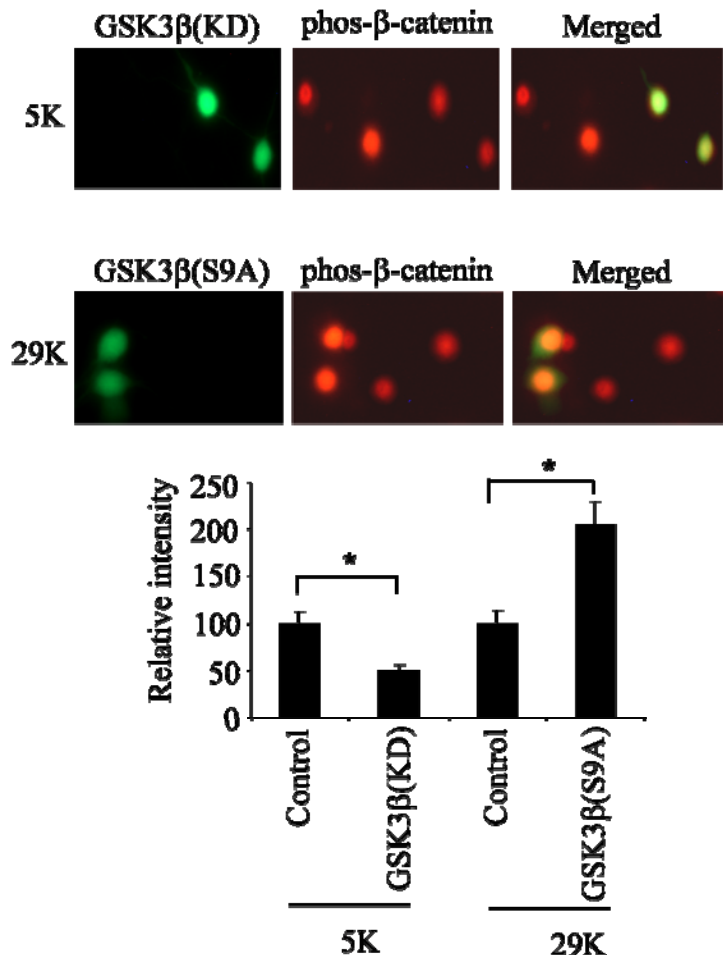

Supplement: supp_M109.067785_jbc.M109.067785-1.pdf [file supp_M109.067785_jbc.M109.067785-1.pdf]
